# Supplementary material for: Synthesis and catalytic activity of a poly(N,N-dialkylcarbodiimide)/palladium nanoparticle composite: a case in the Suzuki coupling reaction using microwave and conventional heating
Source: Royal Society of Chemistry journal article supplement (doi:10.1039/b313210m), 2004-01-01
Supplement: b313210m.doc [file b313210m.doc]

1. Synthesis of palladium nanoparticles stabilized by PDHC

In a typical reaction, an aqueous solution of H2PdCl4 (2.0 mM) was prepared by mixing PdCl2 (70.9 mg, 0.6 mmol), HCl (4.0 mL, 0.2 M) and H2O (196 mL). To a solution of PDHC (63 mg) in toluene (20 mL) was mixed with the H2PdCl4 solution (15 mL, 2 mM, 0.1 equiv to the carbodiimide unit, 3.0 x 10-5 mol).  The resulting mixture was stirred with a magnetic stirrer at room temperature until a clear yellow organic layer was formed. A dark brown sol was formed when an aqueous solution of NaBH4 (6.0 x 10-5 mol) was added to the above reaction mixture.

2. General procedure of Suzuki cross-coupling reactions catalyzed by palladium nanoparticles

To a solution of 3,5-dibromopyridine (142 mg, 0.6 mmol) and phenylboronic acid (220 mg, 1.8 mmol) in 20 mL dioxane were added the colloidal solution of PDHC-Pd (2 mL, 0.5% equiv) and anhydrous K2CO3 (249 mg, 1.8 mmol). The reaction was refluxed for about 20 h while stirring. The reaction mixture was extracted with methylene chloride and dried with anhydrous Na2SO4. The products were purified by column chromatography on silica gels with hexanes/ethyl acetate to give 3,5-diphenylpyridine (124 mg, 90%).

3. General procedure of Suzuki cross-coupling reactions catalyzed by palladium nanoparticles under microwave heating

A Smith Creator® (Personal Chemistry, Inc.) was used for the microwave assisted Suzuki coupling reaction. In a 10-mL glass tube was placed a mixture of iodobenzene (122 mg, 0.6 mol), phenylboronic acid (110 mg, 0.9 mol), PDHC-Pd catalyst (2 mL, 0.5% equiv), and K2CO3 (249 mg, 1.8 mmol) in 3 mL toluene. The reaction vessel was sealed and put into the microwave cavity and was rapidly heated to 100 C by microwave irradiation. After the reaction reached 100 oC, it was held at this temperature for 40 min. After cooling and evaporating the solvent, the residue was purified by column chromatography to give biphenyl (88 mg, 95%).


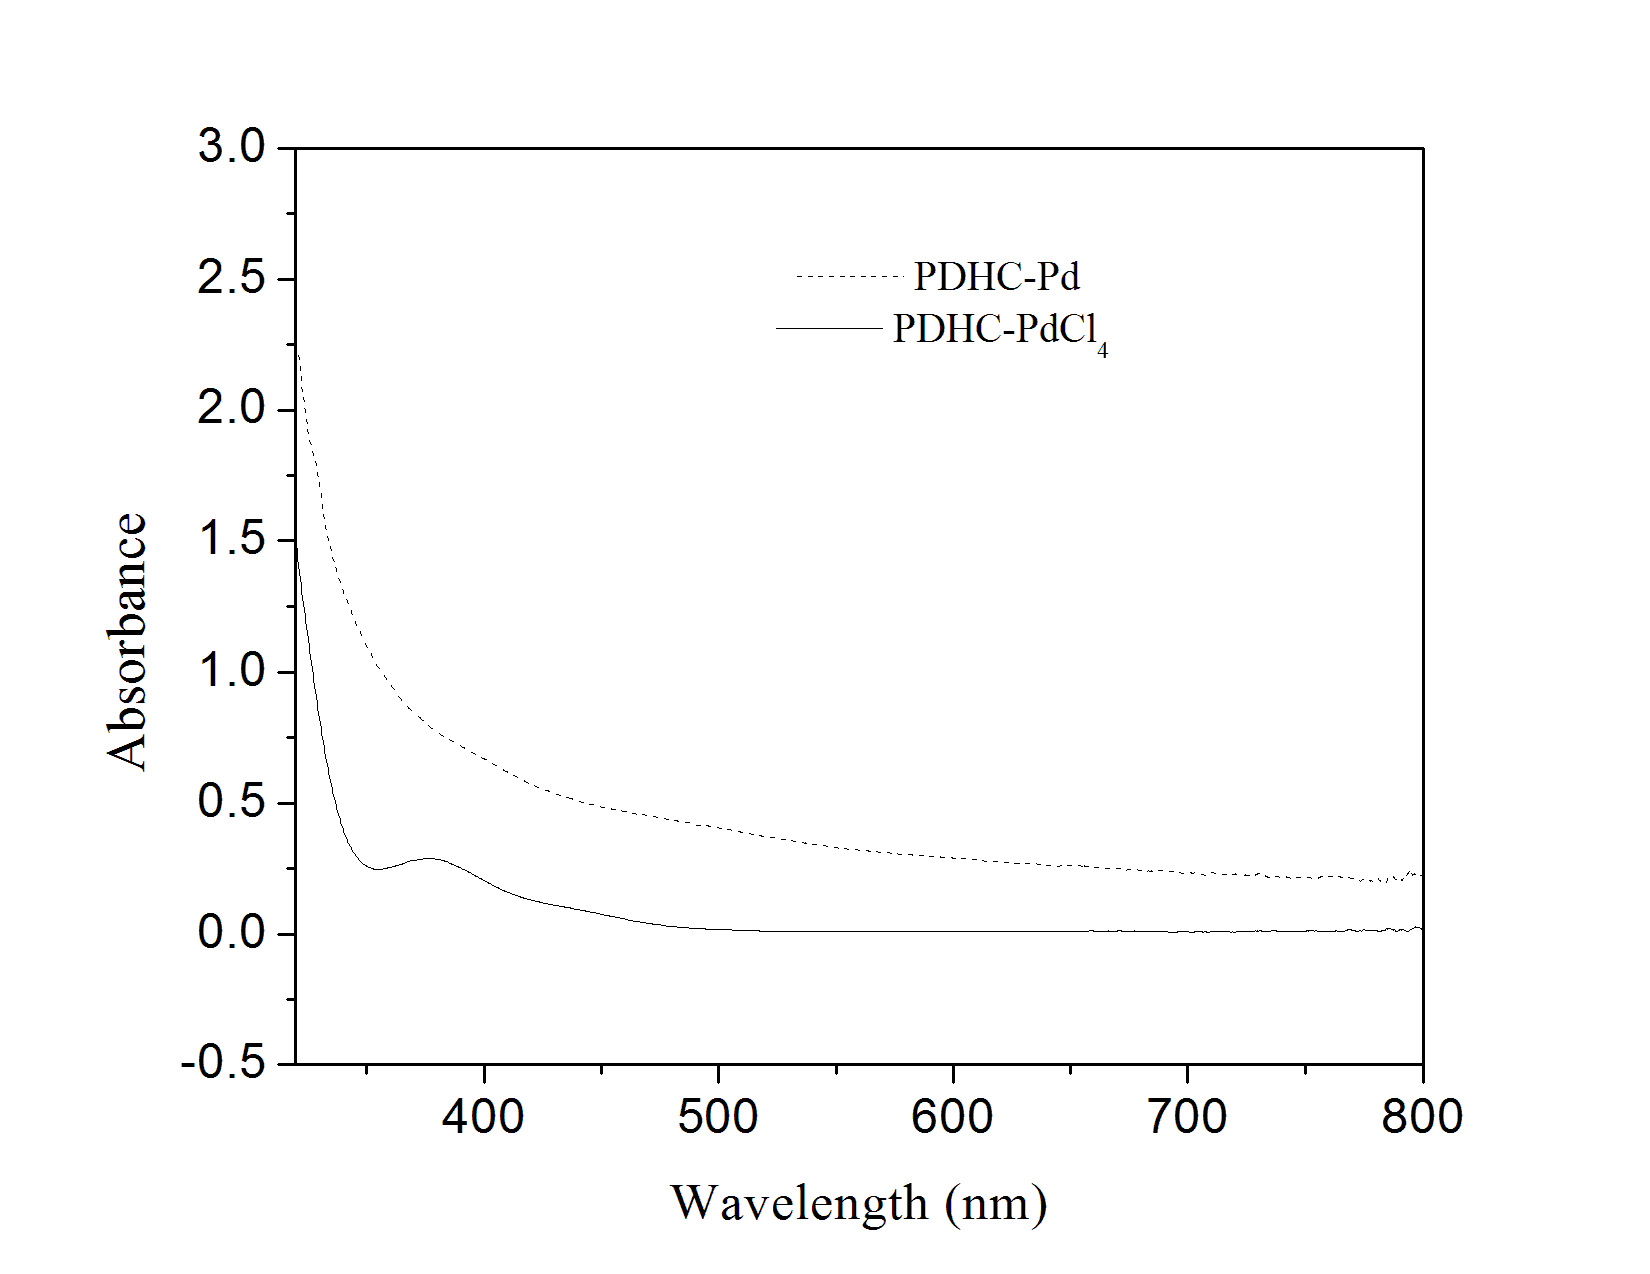


Figure 1.UV-vis spectral changes during the formation of PDHC-Pd nanoparticles
